# Supplementary material for: Hsa-miR-326 targets CCND1 and inhibits non-small cell lung cancer development
Source: PubMed Central journal article supplement (PMC4884997; doi:10.18632/oncotarget.7071), 2016-01-29
Supplement: oncotarget-07-8341-s001.pdf [file oncotarget-07-8341-s001.pdf]

## Hsa-miR-326 targets *CCND1* and inhibits non-small cell lung cancer development

### Supplementary Materials

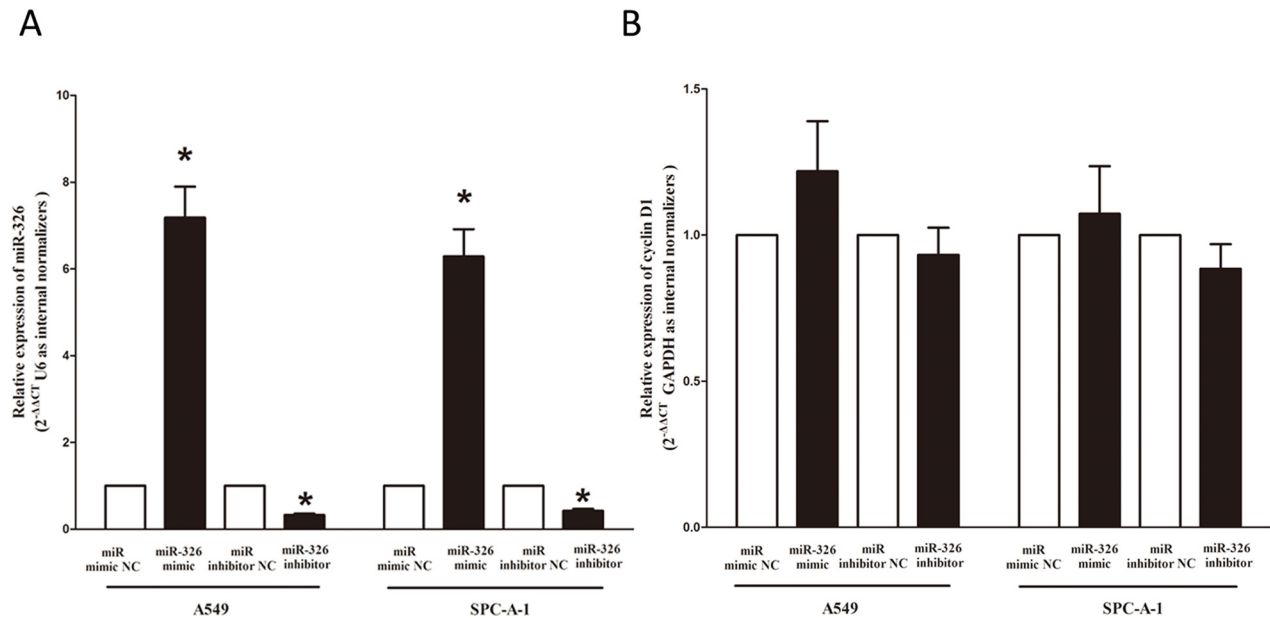

**Supplementary Figure S1: Ectopic expression of miR-326 doesn't vary the mRNA levels of cyclin D1 in A549 and SPC-A-1 cells.** (A) miR-326 mimic treatment increases the expression of miR-326, while miR-326 inhibitor treatment decreases it. (B) Ectopic expression of miR-326 doesn't vary the mRNA levels of cyclin D1 in A549 and SPC-A-1 cells. Assays were performed in triplicate Means  $\pm$  SEM was shown. Statistical analysis was conducted using student *t*-test.
